# Supplementary material for: 7-Methylguanosine lncRNA Signature: Prognostic Validation and Therapy Guidance in Colon Adenocarcinoma
Source: Research Square preprint supplement (doi:10.21203/rs.3.rs-6812043/v1), 2025-07-01
Supplement: Supplementary file 1 [file 0d69aae2e505b3b1ac9876ee.xlsx]

## Sheet: lnc 引物
Supplementary table S4. description of Primers of 14 lncRNAs sequence
id	FORWARD	REVERSE
NCK1-DT	5'-AGTATCATGGCTCCAGTTCCTCT-3'	5'-CCAGCATCACCAGCACAGTC-3'
LINC01063	5’-TGCCGAGTGTGGTTTGCTATC-3’	5’- GCCAATCACCTTCCAGGCTCAG -3’
PCAT6	5'-CAGGAACCCCCTCCTTACTC-3’	5'-CTAGGGATGTGTCCGAAGGA-3‘
WAC-AS1	5′-CAGTGAAGTGGAAGCATGTGTT-3′	5′-TTCTTTGACCCTTCCTTTCCAG-3′
EIF3J-DT	5’-GGCTTCCAGCTCCCTACAAC-3‘	5’-GCCAAAGAACCACTCTGCTAAC-3‘
BACE1-AS	5'-CTTGGGCAAACGAAGGTTGG-3'	5'-CCCAGAGCCCAGCATCAAAA-3'
SNHG16	5'- CCAAGCTTATGCCAGATGGGATCAGCAC-3'	5'- CCGCTCGAGCTTGGTGAGTCAACACTGGGT-3
ZEB1-AS1	5’-TAGGATCCCA CG GT TC TACG-3’	5’-CACACGGTGCTTGTCTCACT-3’
LINC02381	5′-CTGATGGCCACTCACGCTAT-3′	5′-GATCCGGAGGGAGAGCATTC-3′
GAPDH	5‘-AGGTCGGTGTGAACGGATTTG-3’	5‘-TGTAGACCATGTAGTTGAGGTCA-3'
AL161729.4	5‘-TGACCCCTGCATTGATCCCT-3’	5‘-ATTAGACAGGGAGAGGCGAG-3’
AP001505.1	5‘-TTTGGCTCCTGGAAACACCA-3’	5‘-CTGCTTCGTGGTGAGACTCC-3‘
AC074117.1	5‘-TTAGCTGCTCTTCACTGACGCC-3’	5‘-CTCAGTGACTTACACCTGTGATCG-3’
AC107375.1	5‘-AGCTTTGAGCGGCTTCACTC-3’	5‘-GGAGCAAAAGGGAGGAGACG-3’
AC068580.3	5‘-GCAGGAGGTTCCAGAATGGG-3‘	5‘-AGGACCTGATTGCCAAAGGC-3’
