# Supplementary material for: 7-Methylguanosine lncRNA Signature: Prognostic Validation and Therapy Guidance in Colon Adenocarcinoma
Source: Research Square preprint supplement (doi:10.21203/rs.3.rs-6812043/v1), 2025-07-01
Supplement: Supplementary file 2 [file 5ba91df7cbda3ea6cb8c88f2.xlsx]

## Sheet: supplementary material S6
supplementary table S6 results of multivariate cox regression analysis
id	coef	HR	HR.95L	HR.95H	pvalue
NCK1-DT	0.323444	1.38188	1.04074	1.83484	0.025352
AL161729.4	0.710917	2.03586	1.32698	3.12342	0.00113214
LINC01063	0.749852	2.11669	1.54042	2.90854	3.75e-06
PCAT6	0.132199	1.14134	1.00315	1.29855	0.0446677
WAC-AS1	-0.145748	0.864376	0.7831	0.954087	0.00381767
AC107375.1	-0.42187	0.655819	0.447426	0.961275	0.0305868
EIF3J-DT	0.644947	1.90589	1.38324	2.62601	8.02e-05
BACE1-AS	0.194694	1.21494	0.974175	1.51521	0.0840286
SNHG16	-0.271029	0.762595	0.660449	0.880538	0.000220842
AP001505.1	0.0860052	1.08981	1.02092	1.16335	0.00984231
ZEB1-AS1	0.454468	1.57534	1.0064	2.4659	0.0468258
AC068580.3	0.990541	2.69269	1.69831	4.26929	2.53e-05
LINC02381	0.226151	1.25377	1.00603	1.56251	0.044063
AC074117.1	-0.274819	0.75971	0.530722	1.0875	0.13319
