# Supplementary material for: 7-Methylguanosine lncRNA Signature: Prognostic Validation and Therapy Guidance in Colon Adenocarcinoma
Source: Research Square preprint supplement (doi:10.21203/rs.3.rs-6812043/v1), 2025-07-01
Supplement: Supplementary file 3 [file a2b068d4c76e449b4286526c.xlsx]

## Sheet: Sheet1
Supplementary Table 2 identification of M7G genes from KEGG database
METTL1
WDR4
NSUN2
DCP2
DCPS
NUDT10
NUDT11
NUDT16
NUDT3
NUDT4
NUDT4B
AGO2
CYFIP1
EIF4E
EIF4E1B
EIF4E2
EIF4E3
GEMIN5
LARP1
NCBP1
NCBP2
NCBP3
EIF3D
EIF4A1
EIF4G3
IFIT5
LSM1
NCBP2L
SNUPN
