# Supplementary material for: 7-Methylguanosine lncRNA Signature: Prognostic Validation and Therapy Guidance in Colon Adenocarcinoma
Source: Research Square preprint supplement (doi:10.21203/rs.3.rs-6812043/v1), 2025-07-01
Supplement: Supplementary file 4 [file b1f89e6533da4717bf08cd39.xlsx]

## Sheet: Cell Lines
	Supplementary table S5. Pcr results of 14 lncRNAs
	LINC01063									EIF3J-DT								ZEB1-AS1								LINC02318								NCK1-DT								SNHG16
	Sample Name	Target Name	CT	△CT	mean △CT	△△CT	2△△CT			Sample Name	Target Name	CT	△CT	mean △CT	△△CT	2△△CT		Sample Name	Target Name	CT	△CT	mean △CT	△△CT	2△△CT		Sample Name	Target Name	CT	△CT	mean △CT	△△CT	2△△CT		Sample Name	Target Name	CT	△CT	mean △CT	△△CT	2△△CT		Sample Name	Target Name	CT	△CT	mean △CT	△△CT	2△△CT
	NCM460	GAPDH	13.4876							NCM460	GAPDH	13.4876						NCM460	GAPDH	13.4876						NCM460	GAPDH	13.4876						NCM460	GAPDH	13.4876						NCM460	GAPDH	13.4876
	NCM460	GAPDH	13.7739							NCM460	GAPDH	13.7739						NCM460	GAPDH	13.7739						NCM460	GAPDH	13.7739						NCM460	GAPDH	13.7739						NCM460	GAPDH	13.7739
	NCM460	GAPDH	13.7196							NCM460	GAPDH	13.7196						NCM460	GAPDH	13.7196						NCM460	GAPDH	13.7196						NCM460	NCK1-DT	22.0036	8.51602					NCM460	GAPDH	13.7196
	NCM460	LINC01063	28.5396	15.0521						NCM460	EIF3J-DT	25.4557	11.9682					NCM460	ZEB1-AS1	22.6518	9.16425					NCM460	LINC02318	30.4429	16.9553					NCM460	NCK1-DT	22.1099	8.33593	8.42597		1		NCM460	SNHG16	30.7166	17.2291
	NCM460	LINC01063	28.2465	14.4726						NCM460	EIF3J-DT	25.3716	11.5977					NCM460	ZEB1-AS1	22.5142	8.74032					NCM460	LINC02318	30.4989	16.725					HT29	GAPDH	14.3833						NCM460	SNHG16	32.7548	18.9808
	NCM460	LINC01063	29.0164	15.2968	14.9405		1			NCM460	EIF3J-DT	25.325	11.6054	11.7238		1		NCM460	ZEB1-AS1	22.7108	8.99121	8.96526		1		NCM460	LINC02318	30.1883	16.4687	16.7163		1		HT29	GAPDH	14.4261						NCM460	SNHG16	32.0128	18.2932	18.1677		1
	HT29	GAPDH	14.3833							HT29	GAPDH	14.3833						HT29	GAPDH	14.3833						HT29	GAPDH	14.3833						HT29	NCK1-DT	21.8636	7.48037		-0.945603	1.92599		HT29	GAPDH	14.3833
	HT29	GAPDH	14.4261							HT29	GAPDH	14.4261						HT29	GAPDH	14.4261						HT29	GAPDH	14.4261						HT29	NCK1-DT	21.995	7.56892		-0.857056	1.81134		HT29	GAPDH	14.4261
	HT29	GAPDH	14.4553							HT29	GAPDH	14.4553						HT29	GAPDH	14.4553						HT29	GAPDH	14.4553						SW480	GAPDH	13.4734						HT29	GAPDH	14.4553
	HT29	LINC01063	25.2534	10.8701		-4.07037	16.7998			HT29	EIF3J-DT	25.5421	11.1588		-0.564935	1.47932		HT29	ZEB1-AS1	23.2478	8.86457		-0.100688	1.07228		HT29	LINC02318	28.6428	14.2596		-2.45676	5.48984		SW480	GAPDH	13.4489						HT29	SNHG16	27.9219	13.5386		-4.6291	24.7456
	HT29	LINC01063	25.0732	10.6471		-4.29343	19.6088			HT29	EIF3J-DT	25.5366	11.1105		-0.613292	1.52975		HT29	ZEB1-AS1	23.2915	8.86539		-0.0998713	1.07168		HT29	LINC02318	28.8432	14.417		-2.29928	4.92213		SW480	NCK1-DT	22.7112	9.23777		0.811794	0.569673		HT29	SNHG16	27.8868	13.4607		-4.70702	26.1188
	HT29	LINC01063	25.3539	10.8986		-4.04188	16.4713			HT29	EIF3J-DT	25.5063	11.0511		-0.672704	1.59406		HT29	ZEB1-AS1	23.2978	8.84254		-0.122718	1.08878		HT29	LINC02318	29.3253	14.87		-1.84631	3.5958		SW480	NCK1-DT	22.7009	9.25196		0.825982	0.564098		HT29	SNHG16	28.0653	13.61		-4.55772	23.5511
	SW480	GAPDH	13.4734							SW480	GAPDH	13.4734						SW480	GAPDH	13.4734						SW480	GAPDH	13.4734						HCT116	GAPDH	13.3257						SW480	GAPDH	13.4734
	SW480	GAPDH	13.4489							SW480	GAPDH	13.4489						SW480	GAPDH	13.4489						SW480	GAPDH	13.4489						HCT116	GAPDH	13.3624						SW480	GAPDH	13.4489
	SW480	GAPDH	13.5891							SW480	GAPDH	13.5891						SW480	GAPDH	13.5891						SW480	GAPDH	13.5891						HCT116	NCK1-DT	21.264	7.93827		-0.487703	1.40221		SW480	GAPDH	13.5891
	SW480	LINC01063	25.6989	12.2255		-2.71499	6.56589			SW480	EIF3J-DT	24.9715	11.498		-0.225707	1.16935		SW480	ZEB1-AS1	23.7987	10.3253		1.36003	0.389575		SW480	LINC02318	30.7834	17.31		0.593633	0.662672		HCT116	NCK1-DT	21.2501	7.88766		-0.538314	1.45227		SW480	SNHG16	27.8536	14.3801		-3.78759	13.8095
	SW480	LINC01063	25.8156	12.3667		-2.57378	5.95366			SW480	EIF3J-DT	24.6754	11.2265		-0.497273	1.41154		SW480	ZEB1-AS1	23.7171	10.2682		1.30291	0.405308		SW480	LINC02318	31.8826	18.4337		1.7174	0.304097		CACO2	GAPDH	13.1337						SW480	SNHG16	27.4733	14.0244		-4.14332	17.6711
	SW480	LINC01063	25.5767	11.9876		-2.95291	7.74307			SW480	EIF3J-DT	24.9923	11.4032		-0.320563	1.24882		SW480	ZEB1-AS1	23.8598	10.2707		1.30541	0.404605		SW480	LINC02318	31.8011	18.2119		1.49561	0.354631		CACO2	GAPDH	13.1583						SW480	SNHG16	27.5016	13.9125		-4.25526	19.0968
	HCT116	GAPDH	13.3257							HCT116	GAPDH	13.3257						HCT116	GAPDH	13.3257						HCT116	GAPDH	13.3257						CACO2	NCK1-DT	20.4795	7.3458		-1.08017	2.11429		HCT116	GAPDH	13.3257
	HCT116	GAPDH	13.3624							HCT116	GAPDH	13.3624						HCT116	GAPDH	13.3624						HCT116	GAPDH	13.3624						CACO2	NCK1-DT	20.5528	7.39457		-1.03141	2.04401		HCT116	GAPDH	13.3624
	HCT116	GAPDH	13.3575							HCT116	GAPDH	13.3575						HCT116	GAPDH	13.3575						HCT116	GAPDH	13.3575														HCT116	GAPDH	13.3575
	HCT116	LINC01063	28.1759	14.8502		-0.0903279	1.06461			HCT116	EIF3J-DT	25.6879	12.3621		0.63837	0.642438		HCT116	ZEB1-AS1	21.9829	8.65721		-0.308052	1.23803		HCT116	LINC02318	29.1492	15.8235		-0.892866	1.85686										HCT116	SNHG16	32.15	18.8243		0.656576	0.634382
	HCT116	LINC01063	28.2174	14.8549		-0.0855633	1.0611			HCT116	EIF3J-DT	25.7154	12.3529		0.629188	0.64654		HCT116	ZEB1-AS1	21.8218	8.45934		-0.505914	1.42002		HCT116	LINC02318	29.2192	15.8567		-0.8596	1.81453										HCT116	SNHG16	32.7876	19.4251		1.25742	0.418291
	HCT116	LINC01063	28.1259	14.7684		-0.172084	1.12669			HCT116	EIF3J-DT	25.7741	12.4166		0.692856	0.618628		HCT116	ZEB1-AS1	21.9576	8.60012		-0.365137	1.288		HCT116	LINC02318	29.3993	16.0418		-0.674474	1.59602										HCT116	SNHG16	32.3413	18.9838		0.816046	0.567996
	CACO2	GAPDH	13.1337							CACO2	GAPDH	13.1337						CACO2	GAPDH	13.1337						CACO2	GAPDH	13.1337														CACO2	GAPDH	13.1337
	CACO2	GAPDH	13.1583							CACO2	GAPDH	13.1583						CACO2	GAPDH	13.1583						CACO2	GAPDH	13.1583														CACO2	GAPDH	13.1583
	CACO2	GAPDH	13.0866							CACO2	GAPDH	13.0866						CACO2	GAPDH	13.0866						CACO2	GAPDH	13.0866														CACO2	GAPDH	13.0866
	CACO2	LINC01063	28.3586	15.2248		0.284339	0.821118			CACO2	EIF3J-DT	26.159	13.0253		1.30152	0.405699		CACO2	ZEB1-AS1	25.0402	11.9065		2.94124	0.130196		CACO2	LINC02318	33.9672	20.8335		4.11719	0.0576239										CACO2	SNHG16	31.9647	18.8309		0.66324	0.631459
	CACO2	LINC01063	28.3312	15.173		0.232498	0.85116			CACO2	EIF3J-DT	25.9839	12.8257		1.10194	0.465891		CACO2	ZEB1-AS1	24.7997	11.6415		2.67624	0.156449		CACO2	LINC02318	35.4685	22.3103		5.59397	0.0207036										CACO2	SNHG16	31.819	18.6607		0.493022	0.710535
	CACO2	LINC01063	28.3318	15.2452		0.304742	0.809587			CACO2	EIF3J-DT	26.3728	13.2862		1.56241	0.338586		CACO2	ZEB1-AS1	24.894	11.8074		2.84214	0.139454		CACO2	LINC02318	33.3689	20.2823		3.56595	0.084439										CACO2	SNHG16	31.9853	18.8987		0.730981	0.602494
	WAC-AS1									BACE1-AS								PCAT6
	Sample Name	Target Name	CT	△CT	mean △CT	△△CT	2△△CT			Sample Name	Target Name	CT	△CT	mean △CT	△△CT	2△△CT		Sample Name	Target Name	CT	△CT	mean △CT	△△CT	2△△CT
	NCM460	GAPDH	13.4876							NCM460	GAPDH	13.4876						NCM460	GAPDH	13.4876
	NCM460	GAPDH	13.7739							NCM460	GAPDH	13.7739						NCM460	GAPDH	13.7739
	NCM460	WAC-AS1	21.7622	8.27465						NCM460	GAPDH	13.7196						NCM460	GAPDH	13.7196
	NCM460	WAC-AS1	21.9717	8.19775	8.2362		1			NCM460	BACE1-AS	24.7004	11.2128					NCM460	PCAT6	29.1595	15.6719
	HT29	GAPDH	14.3833							NCM460	BACE1-AS	24.6669	10.893					NCM460	PCAT6	28.5425	14.7686
	HT29	GAPDH	14.4261							NCM460	BACE1-AS	24.7031	10.9834	11.0298		1		NCM460	PCAT6	28.9226	15.2029	15.2145		1
	HT29	WAC-AS1	23.3108	8.92759		0.691388	0.619258			HT29	GAPDH	14.3833						HT29	GAPDH	14.3833
	HT29	WAC-AS1	23.0875	8.66138		0.425179	0.744746			HT29	GAPDH	14.4261						HT29	GAPDH	14.4261
	SW480	GAPDH	13.4734							HT29	GAPDH	14.4553						HT29	GAPDH	14.4553
	SW480	GAPDH	13.4489							HT29	BACE1-AS	25.1156	10.7324		-0.297397	1.22893		HT29	PCAT6	27.2173	12.834		-2.38047	5.20705
	SW480	WAC-AS1	22.9173	9.44387		1.20767	0.432967			HT29	BACE1-AS	25.0997	10.6735		-0.356218	1.28007		HT29	PCAT6	27.3705	12.9444		-2.2701	4.82357
	SW480	WAC-AS1	22.9537	9.5048		1.2686	0.415062			HT29	BACE1-AS	25.1734	10.7181		-0.31167	1.24114		HT29	PCAT6	27.5789	13.1237		-2.09083	4.25994
	HCT116	GAPDH	13.3257							SW480	GAPDH	13.4734						SW480	GAPDH	13.4734
	HCT116	GAPDH	13.3624							SW480	GAPDH	13.4489						SW480	GAPDH	13.4489
	HCT116	WAC-AS1	22.2534	8.92766		0.691461	0.619226			SW480	GAPDH	13.5891						SW480	GAPDH	13.5891
	HCT116	WAC-AS1	22.1614	8.79895		0.562751	0.67701			SW480	BACE1-AS	24.3975	10.9241		-0.105678	1.076		SW480	PCAT6	24.0255	10.5521		-4.6624	25.3234
	CACO2	GAPDH	13.1337							SW480	BACE1-AS	24.4319	10.9829		-0.0468353	1.033		SW480	PCAT6	24.2427	10.7938		-4.4207	21.4173
	CACO2	GAPDH	13.1583							SW480	BACE1-AS	24.5366	10.9475		-0.0822872	1.0587		SW480	PCAT6	24.1907	10.6016		-4.61288	24.4689
	CACO2	WAC-AS1	23.4189	10.2852		2.049	0.241651			HCT116	GAPDH	13.3257						HCT116	GAPDH	13.3257
	CACO2	WAC-AS1	23.4067	10.2484		2.01221	0.247893			HCT116	GAPDH	13.3624						HCT116	GAPDH	13.3624
										HCT116	GAPDH	13.3575						HCT116	GAPDH	13.3575
										HCT116	BACE1-AS	24.1656	10.8399		-0.189854	1.14065		HCT116	PCAT6	24.451	11.1253		-4.08922	17.0207
										HCT116	BACE1-AS	24.2565	10.8941		-0.135668	1.0986		HCT116	PCAT6	24.5169	11.1544		-4.06004	16.6799
										HCT116	BACE1-AS	24.1045	10.747		-0.28274	1.2165		HCT116	PCAT6	24.2754	10.9179		-4.29659	19.6518
										CACO2	GAPDH	13.1337						CACO2	GAPDH	13.1337
										CACO2	GAPDH	13.1583						CACO2	GAPDH	13.1583
										CACO2	GAPDH	13.0866						CACO2	GAPDH	13.0866
										CACO2	BACE1-AS	25.0336	11.8999		0.870154	0.547088		CACO2	PCAT6	26.9633	13.8296		-1.38487	2.61148
										CACO2	BACE1-AS	25.0051	11.8469		0.817098	0.567582		CACO2	PCAT6	26.8419	13.6837		-1.53082	2.88951
										CACO2	BACE1-AS	24.9899	11.9033		0.8735	0.545821		CACO2	PCAT6	26.8911	13.8044		-1.41004	2.65745

## Sheet: Tissue
	LINC01063								SNHG16								ZEB1-AS1								LINC02318								WAC-AS1
	Sample Name	Target Name	CT	△CT	mean △CT	△△CT	2△△CT		Sample Name	Target Name	CT	△CT	mean △CT	△△CT	2△△CT		Sample Name	Target Name	CT	△CT	mean △CT	△△CT	2△△CT		Sample Name	Target Name	CT	△CT	mean △CT	△△CT	2△△CT		Sample Name	Target Name	CT	△CT	mean △CT	△△CT	2△△CT
	C1	GAPDH	19.5405						C1	GAPDH	18.098						C1	GAPDH	19.5405						C1	GAPDH	19.5405						C1	GAPDH	18.098
	C1	GAPDH	19.603						C1	GAPDH	18.1487						C1	GAPDH	19.603						C1	GAPDH	19.603						C1	GAPDH	18.1487
	C1	GAPDH	19.5192						C1	GAPDH	18.2603						C1	GAPDH	19.5192						C1	GAPDH	19.5192						C1	WAC	24.0376	5.93965
	C1	LINC01063	30.4459	10.9054					C1	SNHG16	28.1114	10.0135					C1	2EB1-AS1	28.1901	8.64954					C1	LINC02318	29.064	9.52347					C1	WAC	23.9274	5.77868	5.85916	0.00546265	0.996221
	C1	LINC01063	30.7569	11.1539					C1	SNHG16	27.2789	9.13016					C1	2EB1-AS1	28.4059	8.80293					C1	LINC02318	28.1251	8.52215					N1	GAPDH	19.5405
	C1	LINC01063	30.7733	11.2541	11.1044	-1.18977	2.28116		C1	SNHG16	28.3185	10.0582	9.73393	-0.214957	1.16067		C1	2EB1-AS1	28.1198	8.60057	8.68435	-0.756568	1.68947		C1	LINC02318	28.7999	9.28068	9.10877	-1.63146	3.09826		N1	GAPDH	19.603
	N1	GAPDH	18.098						N1	GAPDH	19.5405						N1	GAPDH	18.098						N1	GAPDH	18.098						N1	WAC	25.4372	5.89666
	N1	GAPDH	18.1487						N1	GAPDH	19.603						N1	GAPDH	18.1487						N1	GAPDH	18.1487						N1	WAC	25.4137	5.81074	5.8537		1
	N1	GAPDH	18.2603						N1	GAPDH	19.5192						N1	GAPDH	18.2603						N1	GAPDH	18.2603						C2	GAPDH	17.1963
	N1	LINC01063	30.4632	12.3652					N1	SNHG16	29.8347	10.2942					N1	2EB1-AS1	27.8749	9.77688					N1	LINC02318	28.9682	10.8702					C2	GAPDH	17.2227
	N1	LINC01063	30.4632	12.3145					N1	SNHG16	29.0271	9.42411					N1	2EB1-AS1	27.0607	8.91195					N1	LINC02318	28.9194	10.7706					C2	WAC	23.1042	5.90795
	N1	LINC01063	30.4632	12.2029	12.2942		1		N1	SNHG16	29.6476	10.1284	9.94888		1		N1	2EB1-AS1	27.8942	9.63391	9.44091		1		N1	LINC02318	28.8402	10.5799	10.7402		1		C2	WAC	23.1614	5.93873	5.92334	1.57453	0.335752
	C2	GAPDH	20.0947						C2	GAPDH	17.1963						C2	GAPDH	20.0947						C2	GAPDH	20.0947						N2	GAPDH	20.0947
	C2	GAPDH	20.2422						C2	GAPDH	17.2227						C2	GAPDH	20.2422						C2	GAPDH	20.2422						N2	GAPDH	20.2422
	C2	GAPDH	20.3548						C2	GAPDH	17.0398						C2	GAPDH	20.3548						C2	GAPDH	20.3548						N2	WAC	24.6437	4.54893
	C2	LINC01063	29.2958	9.20104					C2	SNHG16	27.7019	10.5057					C2	2EB1-AS1	27.6649	7.57017					C2	LINC02318	27.1911	7.09634					N2	WAC	24.3909	4.14868	4.34881		1
	C2	LINC01063	28.7928	8.55062					C2	SNHG16	26.9791	9.75643					C2	2EB1-AS1	27.8186	7.57639					C2	LINC02318	27.1814	6.93926					C3	GAPDH	17.3378
	C2	LINC01063	28.9447	8.58988	8.78051	-2.29311	4.90111		C2	SNHG16	27.1908	10.151	10.1377	1.50243	0.352958		C2	2EB1-AS1	27.7237	7.36893	7.50516	-2.51896	5.73171		C2	LINC02318	27.3553	7.0005	7.01203	-2.85579	7.23898		C3	GAPDH	17.3727
	N2	GAPDH	17.1963						N2	GAPDH	20.0947						N2	GAPDH	17.1963						N2	GAPDH	17.1963						C3	WAC	22.8198	5.48201
	N2	GAPDH	17.2227						N2	GAPDH	20.2422						N2	GAPDH	17.2227						N2	GAPDH	17.2227						C3	WAC	22.7668	5.39414	5.43808	1.28747	0.409669
	N2	GAPDH	17.0398						N2	GAPDH	20.3548						N2	GAPDH	17.0398						N2	GAPDH	17.0398						N3	GAPDH	18.9242
	N2	LINC01063	28.2265	11.0303					N2	SNHG16	29.5981	9.50333					N2	2EB1-AS1	27.0264	9.83017					N2	LINC02318	26.7857	9.58948					N3	GAPDH	19.1716
	N2	LINC01063	28.2265	11.0039					N2	SNHG16	27.0419	6.79973					N2	2EB1-AS1	27.1878	9.96509					N2	LINC02318	27.0075	9.78484					N3	WAC	23.1522	4.22801
	N2	LINC01063	28.2265	11.1867	11.0736		1		N2	SNHG16	29.9576	9.60276	8.63527		1		N2	2EB1-AS1	27.3169	10.2771	10.0241		1		N2	LINC02318	27.2689	10.2291	9.86782		1		N3	WAC	23.2448	4.07321	4.15061		1
	C3	GAPDH	18.9242						C3	GAPDH	17.3378						C3	GAPDH	18.9242						C3	GAPDH	18.9242						C4	GAPDH	19.4323
	C3	GAPDH	19.1716						C3	GAPDH	17.3727						C3	GAPDH	19.1716						C3	GAPDH	19.1716						C4	GAPDH	19.2777
	C3	GAPDH	18.9867						C3	GAPDH	17.4623						C3	GAPDH	18.9867						C3	GAPDH	18.9867						C4	WAC	25.4145	5.98224
	C3	LINC01063	28.2344	9.3102					C3	SNHG16	27.2139	9.87608					C3	2EB1-AS1	26.6677	7.74352					C3	LINC02318	26.9166	7.99238					C4	WAC	25.5226	6.24484	6.11354	1.76549	0.294128
	C3	LINC01063	27.9289	8.75728					C3	SNHG16	29.0818	11.7091					C3	2EB1-AS1	26.5251	7.35347					C3	LINC02318	26.271	7.09936					N4	GAPDH	19.7882
	C3	LINC01063	27.7811	8.7944	8.95396	-1.08953	2.12805		C3	SNHG16	24.9895	7.52718	9.70413	3.55275	0.0852149		C3	2EB1-AS1	26.5618	7.57517	7.55739	-1.24742	2.37416		C3	LINC02318	26.7404	7.75373	7.61516	-2.09542	4.27352		N4	GAPDH	19.7646
	N3	GAPDH	17.3378						N3	GAPDH	18.9242						N3	GAPDH	17.3378						N3	GAPDH	17.3378						N4	WAC	24.1345	4.34627
	N3	GAPDH	17.3727						N3	GAPDH	19.1716						N3	GAPDH	17.3727						N3	GAPDH	17.3727						N4	WAC	24.1145	4.34984	4.34805		1
	N3	GAPDH	17.4623						N3	GAPDH	18.9867						N3	GAPDH	17.4623						N3	GAPDH	17.4623
	N3	LINC01063	27.4344	10.0966					N3	SNHG16	25.3661	6.44194					N3	2EB1-AS1	26.18	8.84219					N3	LINC02318	27.0618	9.724
	N3	LINC01063	27.4344	10.0618					N3	SNHG16	26.2646	7.09296					N3	2EB1-AS1	26.1172	8.74455					N3	LINC02318	27.0756	9.70292
	N3	LINC01063	27.4344	9.97211	10.0435		1		N3	SNHG16	23.9059	4.91925	6.15138		1		N3	2EB1-AS1	26.29	8.82767	8.80481		1		N3	LINC02318	27.1672	9.70482	9.71058		1
	C4	GAPDH	19.4323						C4	GAPDH	19.4323						C4	GAPDH	19.7882						C4	GAPDH	19.7882
	C4	GAPDH	19.2777						C4	GAPDH	19.2777						C4	GAPDH	19.7646						C4	GAPDH	19.7646
	C4	GAPDH	19.2808						C4	GAPDH	19.2808						C4	GAPDH	19.8975						C4	GAPDH	19.8975
	C4	LINC01063	30.1184	10.6861					C4	SNHG16	28.9428	9.51047					C4	2EB1-AS1	27.651	7.86275					C4	LINC02318	28.9822	9.19397
	C4	LINC01063	29.838	10.5603					C4	SNHG16	28.5304	9.25264					C4	2EB1-AS1	27.5087	7.74411					C4	LINC02318	28.4801	8.71545
	C4	LINC01063	29.0193	9.73854	10.3283	-1.13454	2.19548		C4	SNHG16	29.9135	10.6327	9.79862	3.30132	0.101439		C4	2EB1-AS1	27.7101	7.81267	7.80651	-1.69036	3.22738		C4	LINC02318	29.0148	9.11731	9.00891	-1.80495	3.49416
	N4	GAPDH	19.7882						N4	GAPDH	19.7882						N4	GAPDH	19.4323						N4	GAPDH	19.4323
	N4	GAPDH	19.7646						N4	GAPDH	19.7646						N4	GAPDH	19.2777						N4	GAPDH	19.2777
	N4	GAPDH	19.8975						N4	GAPDH	19.8975						N4	GAPDH	19.2808						N4	GAPDH	19.2808
	N4	LINC01063	30.6287	10.8405					N4	SNHG16	25.6062	5.81791					N4	2EB1-AS1	28.8352	9.40291					N4	LINC02318	30.3311	10.8988
	N4	LINC01063	32.157	12.3924					N4	SNHG16	27.1612	7.39658					N4	2EB1-AS1	28.5871	9.30937					N4	LINC02318	29.7417	10.464
	N4	LINC01063	31.0532	11.1557	11.4629		1		N4	SNHG16	26.1749	6.2774	6.4973		1		N4	2EB1-AS1	29.0591	9.77834	9.49687		1		N4	LINC02318	30.3596	11.0788	10.8139		1
	NCK1-DT								EIF3J-DT								BACE1-AS								PCAT6
	Sample Name	Target Name	CT	△CT	mean △CT	△△CT	2△△CT		Sample Name	Target Name	CT	△CT	mean △CT	△△CT	2△△CT		Sample Name	Target Name	CT	△CT	mean △CT	△△CT	2△△CT		Sample Name	Target Name	CT	△CT	mean △CT	△△CT	2△△CT
	C1	GAPDH	19.5405						C1	GAPDH	19.5405						C1	GAPDH	18.098						C1	GAPDH	18.098
	C1	GAPDH	19.603						C1	GAPDH	19.603						C1	GAPDH	18.1487						C1	GAPDH	18.1487
	C1	NCK-1	28.1126	8.57207					C1	GAPDH	19.5192						C1	GAPDH	18.2603						C1	GAPDH	18.2603
	C1	NCK-1	27.6751	8.07213	8.3221	-0.988552	1.98419		C1	EIF3J-DT	28.9765	9.43599					C1	BACE1-AS	28.0085	9.91048					C1	PCAT6	27.8403	9.74229
	N1	GAPDH	18.098						C1	EIF3J-DT	28.6981	9.09511					C1	BACE1-AS	28.1553	10.0066					C1	PCAT6	27.8954	9.74666
	N1	GAPDH	18.1487						C1	EIF3J-DT	28.8678	9.34865	9.29325	-1.16267	2.23871		C1	BACE1-AS	28.0038	9.74346	9.88684	-0.510687	1.42473		C1	PCAT6	26.73	8.46971	9.31955	0.169589	0.889096
	N1	NCK-1	27.4962	9.39825					N1	GAPDH	18.098						N1	GAPDH	19.5405						N1	GAPDH	19.5405
	N1	NCK-1	27.3718	9.22306	9.31065		1		N1	GAPDH	18.1487						N1	GAPDH	19.603						N1	GAPDH	19.603
	C2	GAPDH	20.0947						N1	GAPDH	18.2603						N1	GAPDH	19.5192						N1	GAPDH	19.5192
	C2	GAPDH	20.2422						N1	EIF3J-DT	28.6942	10.5962					N1	BACE1-AS	30.0155	10.475					N1	PCAT6	28.9773	9.43671
	C2	NCK-1	29.4067	9.312					N1	EIF3J-DT	28.8153	10.6665					N1	BACE1-AS	29.9833	10.3803					N1	PCAT6	27.9967	8.39369
	C2	NCK-1	28.9633	8.72108	9.01654	-0.230585	1.17331		N1	EIF3J-DT	28.3653	10.105	10.4559		1		N1	BACE1-AS	29.8565	10.3373	10.3975		1		N1	PCAT6	29.1387	9.61949	9.14997		1
	N2	GAPDH	17.1963						C2	GAPDH	20.0947						C2	GAPDH	17.1963						C2	GAPDH	17.1963
	N2	GAPDH	17.2227						C2	GAPDH	20.2422						C2	GAPDH	17.2227						C2	GAPDH	17.2227
	N2	NCK-1	25.9379	8.7416					C2	GAPDH	20.3548						C2	GAPDH	17.0398						C2	GAPDH	17.0398
	N2	NCK-1	26.053	8.8303	8.78595		1		C2	EIF3J-DT	28.135	8.04026					C2	BACE1-AS	26.5584	9.36218					C2	PCAT6	25.9513	8.75505
	C3	GAPDH	18.9242						C2	EIF3J-DT	28.8177	8.57553					C2	BACE1-AS	26.5377	9.31501					C2	PCAT6	25.7874	8.56476
	C3	GAPDH	19.1716						C2	EIF3J-DT	28.9503	8.59545	8.40375	-1.83138	3.55878		C2	BACE1-AS	26.5552	9.51538	9.39752	1.52533	0.347401		C2	PCAT6	25.9614	8.92159	8.74713	0.594286	0.662372
	C3	NCK-1	27.6779	8.75369					N2	GAPDH	17.1963						N2	GAPDH	20.0947						N2	GAPDH	20.0947
	C3	NCK-1	27.5289	8.35734	8.55552	-1.04359	2.06136		N2	GAPDH	17.2227						N2	GAPDH	20.2422						N2	GAPDH	20.2422
	N3	GAPDH	17.3378						N2	GAPDH	17.0398						N2	GAPDH	20.3548						N2	GAPDH	20.3548
	N3	GAPDH	17.3727						N2	EIF3J-DT	27.3806	10.1843					N2	BACE1-AS	28.0228	7.92808					N2	PCAT6	28.4896	8.39488
	N3	NCK-1	26.9494	9.6116					N2	EIF3J-DT	27.3413	10.1186					N2	BACE1-AS	28.0017	7.75956					N2	PCAT6	28.8888	8.64658
	N3	NCK-1	26.9593	9.58662	9.59911		1		N2	EIF3J-DT	27.4423	10.4025	10.2351		1		N2	BACE1-AS	28.2838	7.92896	7.8722		1		N2	PCAT6	27.7719	7.41708	8.15285		1
	C4	GAPDH	19.7882						C3	GAPDH	18.9242						C3	GAPDH	17.3378						C3	GAPDH	17.3378
	C4	GAPDH	19.7646						C3	GAPDH	19.1716						C3	GAPDH	17.3727						C3	GAPDH	17.3727
	C4	NCK-1	27.814	8.02574					C3	GAPDH	18.9867						C3	GAPDH	17.4623						C3	GAPDH	17.4623
	C4	NCK-1	27.9471	8.18252	8.10413	-0.622555	1.5396		C3	EIF3J-DT	26.4021	7.47795					C3	BACE1-AS	26.157	8.81915					C3	PCAT6	25.6069	8.26912
	N4	GAPDH	19.4323						C3	EIF3J-DT	26.5602	7.38857					C3	BACE1-AS	26.161	8.78831					C3	PCAT6	25.5004	8.1277
	N4	GAPDH	19.2777						C3	EIF3J-DT	26.5088	7.52215	7.46289	-1.04254	2.05986		C3	BACE1-AS	26.0266	8.56424	8.7239	0.622614	0.649493		C3	PCAT6	25.4146	7.95223	8.11635	0.19225	0.87524
	N4	NCK-1	27.6668	8.23451					N3	GAPDH	17.3378						N3	GAPDH	18.9242						N3	GAPDH	18.9242
	N4	NCK-1	28.4966	9.21886	8.72668		1		N3	GAPDH	17.3727						N3	GAPDH	19.1716						N3	GAPDH	19.1716
									N3	GAPDH	17.4623						N3	GAPDH	18.9867						N3	GAPDH	18.9867
									N3	EIF3J-DT	26.1116	8.7738					N3	BACE1-AS	27.0667	8.14256					N3	PCAT6	26.4901	7.5659
									N3	EIF3J-DT	25.9133	8.54059					N3	BACE1-AS	27.0649	7.8933					N3	PCAT6	27.2145	8.04292
									N3	EIF3J-DT	25.6642	8.2019	8.50543		1		N3	BACE1-AS	27.2547	8.268	8.10129		1		N3	PCAT6	27.1501	8.16348	7.9241		1
									C4	GAPDH	19.4323						C4	GAPDH	19.4323						C4	GAPDH	19.4323
									C4	GAPDH	19.2777						C4	GAPDH	19.2777						C4	GAPDH	19.2777
									C4	GAPDH	19.2808						C4	GAPDH	19.2808						C4	GAPDH	19.2808
									C4	EIF3J-DT	26.3573	6.92499					C4	BACE1-AS	28.0965	8.66425					C4	PCAT6	26.5787	7.14637
									C4	EIF3J-DT	26.9678	7.69008					C4	BACE1-AS	28.5285	9.25078					C4	PCAT6	26.5865	7.30873
									C4	EIF3J-DT	26.5689	7.28808	7.30105	-0.85887	1.81362		C4	BACE1-AS	28.2654	8.98456	8.96653	1.06933	0.476541		C4	PCAT6	26.6946	7.41376	7.28962	-1.11873	2.17155
									N4	GAPDH	19.7882						N4	GAPDH	19.7882						N4	GAPDH	19.7882
									N4	GAPDH	19.7646						N4	GAPDH	19.7646						N4	GAPDH	19.7646
									N4	GAPDH	19.8975						N4	GAPDH	19.8975						N4	GAPDH	19.8975
									N4	EIF3J-DT	28.2926	8.50439					N4	BACE1-AS	27.8613	8.07307					N4	PCAT6	28.47	8.68174
									N4	EIF3J-DT	28.0067	8.24204					N4	BACE1-AS	27.5714	7.80677					N4	PCAT6	28.0742	8.30957
									N4	EIF3J-DT	27.6308	7.73333	8.15992		1		N4	BACE1-AS	27.7092	7.81176	7.8972		1		N4	PCAT6	28.1312	8.23373	8.40834		1
