# Supplementary material for: 7-Methylguanosine lncRNA Signature: Prognostic Validation and Therapy Guidance in Colon Adenocarcinoma
Source: Research Square preprint supplement (doi:10.21203/rs.3.rs-6812043/v1), 2025-07-01
Supplement: Supplementary file 5 [file fd5f2054ba7bb3de35669252.xlsx]

## Sheet: Sheet1
Supplementary Table 1 Clinical characteristics of patients from TCGA database
	Clinical characteristics	N	percent
Status	Alive	353	77.5824
	Dead	102	22.4176
Age	Mean (SD)	66.9 (13.1)
	Median [MIN, MAX]	68 [31,90]
Gender	FEMALE	215	47.2527
	MALE	240	52.7473
Race	AMERICAN INDIAN	1	0.21978
	ASIAN	11	2.41758
	BLACK	60	13.1868
	WHITE	212	46.5934
pT_stage	T1	11	2.41758
	T2	77	16.9231
	T3	310	68.1319
	T4	28	6.15385
	T4a	19	4.17582
	T4b	9	1.97802
	Tis	1	0.21978
pN_stage	N0	268	58.9011
	N1	73	16.044
	N1a	15	3.2967
	N1b	15	3.2967
	N1c	2	0.43956
	N2	61	13.4066
	N2a	8	1.75824
	N2b	13	2.85714
pM_stage	M0	333	73.1868
	M1	52	11.4286
	M1a	9	1.97802
	M1b	3	0.659341
	MX	51	11.2088
pTNM_stage	I	74	16.2637
	IA	1	0.21978
	II	30	6.59341
	IIA	136	29.8901
	IIB	10	2.1978
	IIC	1	0.21978
	III	20	4.3956
	IIIA	8	1.75824
	IIIB	59	12.967
	IIIC	41	9.01099
	IV	45	9.89011
	IVA	17	3.73626
	IVB	2	0.43956
